# Supplementary material for: 动情、动心与动听——演讲稿的写作要求及出彩方法
Source: Atypon-hosted journal article supplement (doi:10.1187/cbe.12-06-0073), 2011-01-01
Supplement: combinedsupmats1.pdf [file combinedsupmats1.pdf]

# Supplemental Material

*CBE—Life Sciences Education*  
Campbell et al.

References Categorized in Content Analysis done in Campbell, C., Nehm, R. H., and Morton, B. Evaluating Assessment Quality in Genomics and Bioinformatics Education Research

## Key

|                    |                                                                                                                                   |
|--------------------|-----------------------------------------------------------------------------------------------------------------------------------|
| Curricular Level:  | Course (C); Lesson (L); Resource (R); Program (P); Professional Development (PD)                                                  |
| Educational Level: | Secondary (S); Undergraduate (U); Graduate (G)                                                                                    |
| Learning Targets:  | Affective (A); Cognitive (Cog); Psychomotor (Psy)                                                                                 |
| Quality Control:   | Validity in Education Research (V); Reliability in Education Research (Rel); validity and reliability in scientific context (Sci) |

1. Ackovska, N. & Madevska-Bogdanova, A. (2005). Teaching bioinformatics to computer science students. In *EUROCON 2005* (pp. 811-814). Belgrade, Serbia-Montenegro: IEEE. C; U; A, Psy; Sci
2. Almeida, C.A., Tardiff, D.F. & De Luca, J.P. (2004). An introductory bioinformatics exercise to reinforce gene structure and expression and analyze the relationship between gene and protein sequences. *Biochemistry and Molecular Biology Education*, 32(4), 239-245. L; U; A, Cog, Psy; Sci
3. Alterovitz, G. & Ramoni, M.F. (2007) Bioinformatics and proteomics: an engineering problem solving-based approach. *IEEE Transactions on Education*, 50(1), 49-54. C; U; A
4. Altman, R.B., & Koza, J. (1996). A programming course in bioinformatics for computer and information science students. In *Proceedings of the Pacific Symposium in Biocomputing*, 73–84. C; U; A, Psy
5. Amador, P., Prudencio, C., Vieira, M., Ferraz, R., Fonteff, R., Silva, N., et al. (2009).  $\beta$ -lactamases in the biochemistry and molecular biology laboratory. *Biochemistry & Molecular Biology Education*, 37(5), 301-306. C; U; Cog, Psy
6. Andersson, S., et. al. (2001). Theory-anchored evaluation applied to a CSCL intense course in bioinformatics. In *proceedings of The First European Conference on Computer-Supported Collaborative Learning*, Euro-CSCL, Maastricht, March 22 - 24, 2001. C; U; Cog
7. Bateman, R. C., Booth, D., Sirochman, R., Richardson, J. S., & Richardson, D. C. (2002) Teaching and assessing three-dimensional molecular literacy in undergraduate biochemistry. *Journal of Chemistry Education*, 79, 551–552. L; U; A, Cog
8. Beck, J., Buckner, N., Nikolova, O., & Janick-Buckner, D. (2007). Using interdisciplinary bioinformatics undergraduate research to recruit and retain computer science students. *SIGCSE Bulletin*, 39(1), 358-361. C; U; A
9. Bednarski, A.E., Elgin, S.C.R., & Pakrasi, H.B. (2005). An inquiry into protein

- structure and genetic disease: introducing undergraduates to bioinformatics in a large introductory course. *Cell Biology Education*, 4, 207–220. L; U; A, Cog, Psy
10. Bergland, M., Lunderberg, M., Klyczek, K., Sweet, J., Emmons, J., Martin, C., et al. (2006) Exploring biotechnology using case-based multimedia. *The American Biology Teacher*, 68(2), 81-86. L; U; A, Cog, Psy; Sci
  11. Boyle, J.A. (2002). Using the human genome: a case study in education. *Biochemistry and Molecular Biology Education*, 30(6), 368-371. C; U; Cog
  12. Brame, C.J., Pruitt, W.M., & Robinson, L.C. (2008) A molecular genetics laboratory course applying bioinformatics and cell biology in the context of original research. *CBE—Life Sciences Education*, 7, 410-421. L; U; Cog; Sci
  13. Brazeau, D.A. & Brazeau, G.A. (2006). A required course in human genomics, pharmacogenomics, and bioinformatics. *American Journal of Pharmaceutical Education*, 70(6), 125. C; G; A, Cog
  14. Buckner, B., Beck, J., Browning, K., Fritz, A., Grantham, L., Hoxha, E., et al. (2007). Involving undergraduates in the annotation and analysis of global gene expression studies: creation of a maize shoot apical meristem expression database. *Genetics*, 176(2), 741-747. C; U; Cog; Sci
  15. Butler, P.J., Dong, C., Snyder, A.J., Jones, A.D. & Sheets, E.D. (2008). Bioengineering and Bioinformatics Summer Institutes: meeting modern challenges in undergraduate summer research. *CBE—Life Sciences Education*, 7, 45–53. P; U; A, Cog, Psy; Sci
  16. Buxeda, R.J. & Moore-Russo, D.A. (2003). Enhancing biology instruction with the Human Genome Project. *The American Biology Teacher*, 65(9), 664–668. L; U; A, Cog
  17. Campbell, A.M. (2003). Public access for teaching genomics, proteomics, and bioinformatics. *Cell Biology Education*, 2, 98–111. C; U; A, Cog
  18. Campbell, A.M., Zanta, C.A., Heyer, L.J., Kittinger, B., Gabric, K.M., & Adler, L. (2006). DNA microarray wet lab simulation brings genomics into the high school curriculum. *CBE—Life Sciences Education*, 5, 332–339. L; S; Cog
  19. Campbell, A.M., Ledbetter, M.L.S., Hoopes, L.L.M., Eckdahl, T.T., Heyer, L.J., Rosenwald, A., et al. (2007). Genome Consortium for Active Teaching: meeting the goals of BIO2010. *CBE—Life Sciences Education*, 6, 109–118. P; U; Cog
  20. Canning, D. R., & Cox, J. R. (2001) Teaching the structural nature of biological molecules: molecular visualization in the classroom and in the hands of students. *Chemistry Education: Research and Practice in Europe*, 2(2), 109–122. C; U; Cog, Psy
  21. Centeno, N.B., Villa-Freixa, J., & Oliva, B. (2003). Teaching structural bioinformatics at the undergraduate level. *Biochemistry and Molecular Biology Education*, 31(6), 386–391. C; U; Cog; Sci
  22. Chapman, B.S., Christmann, J.L., & Thatcher, E.F. (2006). Bioinformatics for undergraduates: Steps toward a quantitative bioscience curriculum. *Biochemistry and Molecular Biology Education*, 34(3), 180-186. C; U; A, Cog; Sci,V
  23. Cox, J. R. (2000). Teaching noncovalent interactions in the biochemistry curriculum through molecular visualization: the search for  $\pi$ -interactions, *Journal of Chemical Education*, 77(11), 1424–1428. L; U; A

24. Craciun, D., Isvoran, A. (2009). Teaching molecular biology using computational tools and tacking into account the learning styles of students. *Romanian Biotechnological Letters*, 14(4), 4567-4574. R; Cog
25. Curioso, W.H., Hansen, J.R., Centurion-Lara, A., Garcia, P.J., Wolf, F.M., Fuller, S. et al. (2008). Evaluation of a joint Bioinformatics and Medical Informatics international course in Peru. *BMC Medical Education*, 8(1). Retrieved from: <http://www.biomedcentral.com/1472-6920/8/1>. C; G; Cog; Sci
26. Cutter, P. (2007, March). Having a BLAST: a bioinformatics project in CS2. *ACM SIGCSE Bulletin*, 39(1), 353-357. L; U; A, Cog
27. D'Costa, A., & Shepherd, I. T. (2009). Zebrafish development and genetics: Introducing undergraduates to developmental biology and genetics in a large introductory laboratory class, *Zebrafish*, 6(2): 169-177. doi:10.1089/zeb.2008.0562. C; U; Cog
28. De La Vega, F.M., Giegerich, R., & Fuellen, G. (1996). Distance education through the internet: the GNA-VSNS biocomputing course. In Hunter, L. & Klein, T. (eds). *Proceedings of the Pacific Symposium on Biocomputing '96*, World Scientific Publishing, 203-215. C; G; Cog
29. Dignan, M.B., Burhansstipanov, L. & Bemis, L. (2005). Successful implementation of genetic education for Native Americans workshops at national conferences. *Genetics*, 169(2), 517–521. C; U; Cog
30. Dionisio, J.D.N. & Dahlquist, K.D. (2008). Improving the computer science in bioinformatics through open source pedagogy. *ACM SIGCSE Bulletin*, 40(2), 115-119. C; G; A, Cog
31. Drew, J.C. & Triplett, E.W. (2009). Whole genome sequencing in the undergraduate classroom: Outcomes and lessons from a pilot course. *Journal of Microbiology and Biology Education*, 9, 3-11. C; U; Cog
32. Dyer, B., & LeBlanc, M. (2002). Meeting Report: Incorporating genomics research into undergraduate curricula. *Cell Biology Education*, 1(4), 101–104. PD; A
33. Dymond, J.S., Scheifele, L.Z., Richardson, S., Lee, P., Chandrasegaran, S., Bader, J.S., et al. (2009). Teaching synthetic biology, bioinformatics and engineering to undergraduates: the interdisciplinary Build-a-Genome course. *Genetics*, 181(1), 13–21. C; U; Psy; Sci
34. Eberhardt, E. S., Hansen, J., Riservato, L., Cole, M., Smaglo, B., Szaniawski, P. (2003). Preparing undergraduates to participate in the post-genome era: A capstone laboratory experience in proteomics. *Biochemistry and Molecular Biology Education*, 31, 402–409. C; U; Cog, Psy
35. Farh, L., Lee, S.J. (2008). A Project-based Assessment for introductory bioinformatics course - An assessment Aimed to reinforce students ability in data analyses interpretation and integration. *Proceedings of the International Conference on BioMedical Engineering and Informatics BMEI 2008*, 2, 832–837. R; Cog, Psy; Sci
36. Floriano, W.B. (2008). A portable bioinformatics course for upper-division undergraduate curriculum in sciences. *Biochemistry and Molecular Biology Education*, 36(5), 325-335. C; U; Cog, Psy

37. Fornasari, M.S., Parisi, G. & Echave, J. (2008). Teaching noncovalent interactions using protein molecular evolution. *Biochemistry and Molecular Biology Education*, 36(4), 284-286. L; U; Cog
38. Forst, S., Goodner, B. (2006). Comparative bacterial genomics and its use in undergraduate education. *Biological Control*, 38, 47-53. R; Cog
39. Furge, L. L., Stevens-Truss, R. Moore, D. B., & Langeland, J. A. (2009). Vertical and horizontal integration of bioinformatics education: a modular, interdisciplinary approach. *Biochemistry and Molecular Biology Education*, 37(1), 26-36. P; U; A; Sci
40. Gelbart, H. & Yarden, A. (2006). Learning genetics through an authentic research simulation in bioinformatics. *Journal of Biological Education*, 40(3), 107-112. R; Cog
41. Gelbart, H., Brill, G., & Yarden, A. (2009). The impact of a web-based research simulation in bioinformatics on students' understanding of genetics. *Research in Science Education*, 39, 725-751. C; S; Cog; V, Rel
42. Gibbons, N.J., Evans, C., Payne, A., Shah, K., & Griffin, D.K. (2004). Computer simulations improve university instructional laboratories. *Cell Biology Education*, 3(4), 263-269. C; U; Cog, Psy
43. Griffin, V., McMiller, T., Jones, E., & Johnson, C.M. (2003). Identifying novel helix-loop-helix genes in *Caenorhabditis elegans* through a classroom demonstration of functional genomics. *Cell Biology Education*, 2, 51-62. L; U; A, Cog
44. Grunwald, S.K. & Krueger, K.J. (2008). Improvement of student understanding of how kinetic data facilitates the determination of amino acid catalytic function through an alkaline phosphatase structure/mechanism bioinformatics exercise. *Biochemistry and Molecular Biology Education*, 36(1), 9-15. L; U; Cog
45. Hacisalihoglu, G., Hilgert, U., Nash, E. B., & Micklos, D. A. (2008). An innovative plant genomics and gene annotation program for high school, community college, and university faculty. *CBE - Life Sciences Education*, 7(3), 310-316. PD; Cog
46. Harris, M.A, Peck, R.F., Colton, S., Morris, J., Neto, E.C., Kallio, J. (2009). A combination of hand-held models and computer imaging programs helps students answer oral questions about molecular structure and function: A controlled investigation of student learning. *CBE - Life Sciences Education*, 8, 29-43. C; U; A, Cog
47. Herron, S.S. (2009). From cookbook to collaborative: Transforming a university biology laboratory course. *The American Biology Teacher*, 71(9), 548-552. C; U; Cog; Rel, Sci
48. Hingamp, P., Brochier, C., Talla, E., Gautheret, D., Denis Thieffry, D., & Herrmann, C. (2008). Metagenome annotation using a distributed grid of undergraduate students. *PLoS Biology*, 6(11), 296. C; U; A, Cog, Psy; Sci
49. Holtzclaw, J.D., Eisen, A., Whitney, E.M., Penumetcha, M., Hoey, J.J. & Kimbro, K.S. (2006). Incorporating a new bioinformatics component into genetics at a historically black college: outcomes and lessons. *CBE—Life Sciences Education*, 5, 52-64. C; U; A

50. Hooley, P., Chilton, I.J., Fincham, D.A., Burns, A.T., & Whitehead, M.P. (2007). Assigning level in data-mining exercises. *Bioscience Education e-Journal*, 9. Retrieved from: <http://www.bioscience.heacademy.ac.uk/journal/vol9/beej-9-4.pdf>. C; U; A, Cog, Psy
51. Hooley, P., Cooper, P., & Skidmore, N. (2008). Molecular biology masterclasses – developing practical skills and building links with higher education in years 12/13. *Bioscience Education e-Journal*, 11. Retrieved from: <http://www.bioscience.heacademy.ac.uk/journal/vol11/beej-11-6.pdf>. P; S; A
52. Howard, D.R., Grunwald, S.A., & Miskowski, J.A. (2007). Assessment of a bioinformatics across life science curricula initiative. *Biochemistry and Molecular Biology Education*, 35(1), 16-23. C; U; A, Cog; Sci, V
53. Knight, J.D., Fulop, R.M., Leticia Márquez-Magaña, L., & Tanner, K.D. (2008). Investigative cases and student outcomes in an upper-division cell and molecular biology laboratory course at a minority-serving institution. *CBE—Life Sciences Education*, 7, 382-393. C; U; A, Cog
54. Krilowicz, B., Johnston, W., Sharp, S.B., Warter-Perez, N., Momand, J. (2007). A summer program designed to educate college students for careers in bioinformatics. *CBE—Life Sciences Education*, 6, 74-83. P; U; A, Cog
55. Kuldell, K.H. (2006). How golden is silence? Teaching undergraduates the power and limits of RNA interference. *CBE Life Sciences Education*, 5(3), 247-254. L; U; Cog; Sci
56. Kumar, A. (2005). Teaching systems biology: an active-learning approach. *Cell Biology Education*, 4, 323–329. L; G; A
57. LeClair, E.E. (2008). Teaching the toolkit: a laboratory series to demonstrate the evolutionary conservation of metazoan cell signaling pathways. *Biochemistry and Molecular Biology Education*, 36(3), 225-233. C; U; Cog, Psy
58. Levis-Fitzgerald, M., Denson, N., & Kerfeld, C.A. (2004). "Hands-On" undergraduate research opportunities in the life sciences: Preparing the next generation of biological researchers. *Presented at the Annual Meeting of the Association for the Study of Higher Education on November 5, 2004*. C; U; A, Cog
59. Levis-Fitzgerald, M., Denson, N., & Kerfeld, C.A. (2005). Undergraduate students conducting research in the life sciences: Opportunities for connected learning. *Presented at the Annual Meeting of the Association for the Study of Higher Education on November 17-19, 2005*. C; U; A, Cog
60. Lim, Y.P., Höög, J., Gardner, P., Ranganathan, S., Andersson, S., Subbiah, S., et al. (2003). The S-Star trial bioinformatics course: An online learning success. *Biochemistry and Molecular Biology Education*, 31(1), 20-23. R; Cog
61. Lima, A.O.S., Garces, S.P.S. (2006) Intrageneric primer design: Bringing bioinformatics tools to the class. *Biochemistry and Molecular Biology Education*, 34(5), 332–337. L; U; Psy
62. Liu, D., Amagai, S., Cordon, A. (2001). Development and evaluation of virtual labs and other interactive learning tools. *Biochemistry and Molecular Biology Education*, 39, 163-164. R; A, Cog

63. Lopatto, D., Alvarez, C., Barnard, D., Chandrasekaran, C., Chung, H.-M., Du, C. et al. (2008). Undergraduate research: Genomics education partnership. P; U; A, Cog; Sci
64. Lowery, M. S., & Plesniak, L. A. (2003). Some like it cold: a computer-based laboratory introduction to sequence and tertiary structure comparison of cold-adapted lactate dehydrogenases using bioinformatics tools. *Journal of Chemical Education*, 80(11), 1300–1302. L; U; A, Cog, Psy
65. Lundeberg, M.A., Bergland, Klyczek, K. & Hoffman, D. (2003, April). Windows to the world: perspectives on case-based multimedia web projects in science. Paper presented at the Annual Meeting of the American Educational Research Association, New Orleans. C; S; A, Cog
66. Luo, Y., Gong, X., Xu, L., & Li, S. (2007). Isolation of RNA and RT-PCR, cloning, and sequencing of noncoding RNAs from fungi. *Biochemistry & Molecular Biology Education*, 35(5), 355-358. L; U; Psy; Sci
67. Magee, J., Gordon, J.I., and Whelan, A. (2001). Bringing the human genome and the revolution in bioinformatics to the medical school classroom: a case report from Washington University School of Medicine. *Academic Medicine*, 76(8), 852–855. L; G; Cog, Psy
68. Malacinski, G.M, Zell, P.W. (1996) Learning molecular biology means more than memorizing the formula for tryptophan. *Journal of College Science Teaching*, 25, 198–202. C; U; Cog; Sci
69. McEwen, L.A., Harris, D., Schmid, R.F., Vogel, J., Western, T., & Harrison, P. (2009). Evaluation of the redesign of an undergraduate cell biology course. *CBE Life Sciences Education*, 8(1), 72–78. L; A, U; Psy; Sci, V
70. Palladino, M.A., Cosentino, E. (2001). A DNA fingerprinting simulation for biology students: Hands-on experimentation to solve a mock forensic problem. *The American Biology teacher*, 63(8), 596-605. R; A
71. Peterson, R. R., & Cox, J. R. (2001). Integrating computational chemistry into a project-oriented biochemistry experience: a new twist on the lysozyme experiment. *Journal of Chemical Education*, 78, 1551–1555. L; S; A, Cog
72. Pham, D.Q.-D., Higgs, D.C., Statham, A., & Schleiter, M.K. (2008). Implementation and assessment of a molecular biology and bioinformatics undergraduate degree program. *Biochemistry and Molecular Biology Education*, 36(2), 106 – 115. P; U; Cog, Psy
73. Poe, D., Venkatraman, N., Hansen, C., & Singh, G. (2009). Component-based approach for educating students in bioinformatics. *IEEE Transactions on Education*, 52(1), 1-9. R; Cog
74. Porter, S.G., Day, J., McCarty, R.E., Shearn, A., Shingles, R., Fletcher, L., et al. (2007). Exploring DNA structure with Cn3D. *CBE Life Sciences Education*, 6(1), 65–73. C; S; Cog
75. Qin, H. (2009). Teaching computational thinking through bioinformatics to biology students. *SIGCSE Bulletin*, 41(1), 188-191. C; U; Cog; Sci
76. Ramlo, S., McConnell, D., Zhong-Hui, D., & Moore, F. (2008). Evaluating an inquiry-based bioinformatics course using Q methodology. *Journal of Science Education & Technology*, 17(3), 219-225. C; U; A, Cog

77. Rice, M., Gladstone, W., & Weier, M. (2004). Relational databases: A transparent framework for encouraging biology students to think informatically. *Cell Biology Education*, 3, 241–252. C; U; Cog
78. Robertson, A.L., Phillips, A.R. (2008). Integrating PCR theory and bioinformatics into a research-oriented primer design exercise. *CBE - Life Sciences Education*, 7(1), 89-95. L; U; Cog
79. Rowland-Goldsmith, M. (2009). A new way to introduce microarray technology in a lecture/laboratory setting by studying the evolution of this modern technology. *Biochemistry and Molecular Biology Education*, 37(1), 37-43. C; U; Cog; Sci
80. Shachak, A., Ophir, R., & Rubin, E. (2005). Applying instructional design theories to bioinformatics education in microarray analysis and primer design workshops. *Cell Biology Education*, 4(3), 199-206. R; Psy; Sci
81. Shaffer, C.D., Alvarez, C., Bailey, C., Barnard, D., Bhalla, S., Chandrasekaran, C., et. al. (2010). The Genomics Education Partnership: Successful integration of research into laboratory classes at a diverse group of undergraduate institutions. *CBE—Life Sciences Education*, 9, 55-69. C; U; A, Cog, Psy; Sci
82. Song, H., Venkatraman, N., Hansen, C., & Singh, G. (2005). Enhancing course content by cognitive styles: a case study with bioinformatics at high schools. *Frontiers in Education Conference* (pp. S1G26-32). Indianapolis, IN: IEEE. C; S; A, Cog
83. Soto, J.G. (2005). Understanding the Human Genome Project: using stations to provide a comprehensive overview. *The American Biology Teacher*, 67(8), 475-484. L; U; A, Cog, Psy
84. Sousa, J.C., Costa, M.J., & Palha, J.A. (2010). Teaching the extracellular matrix and introducing online databases within a multidisciplinary course with i-cell-MATRIX. *Biochemistry and Molecular Biology Education*, 38(2), 79-84. C; G; Psy
85. Swanson, E. & Lybrand, T.P. (1996). Computational biology instruction at the University of Washington Center for Bioengineering. In Hunter, L. & Klein, T. (eds). *Proceedings of the Pacific Symposium on Biocomputing '96*, World Scientific Publishing. C; U; Cog, Psy
86. Temple, L., Cresawn, S.G., & Monroe, J.D. (2010). Genomics and bioinformatics in undergraduate curricula: Contexts for hybrid laboratory/lecture courses for entering and advanced science students. *Biochemistry and Molecular Biology Education*, 38(1), 23-28. C; U; A
87. Tikekar, R. (2006). Stroke of GENEous: a tool for teaching bioinformatics to information systems majors. *Bioscene: Journal of College Biology Teaching*, 32(1), 4-8. L; A, U; Cog
88. Tuimala, J. (2006). Phylogenetics exercise using inherited human traits. *Biochemistry and Molecular Biology Education*, 34(4), 300-304. L; U; Cog, Psy
89. Weaver, T. & Cooper, S. (2005). Exploring protein function and evolution using free online bioinformatics tools, *Biochemistry and Molecular Biology Education*, 33(5), 319–322. L; U; Psy
90. Wefer, S. H. (2003). Name that gene: an authentic classroom activity incorporating bioinformatics. *The American Biology Teacher*, 65(8), 610–613. L; S; A, Psy

91. Wefer, S.H., & Anderson, O.R. (2008). Identification of students' content mastery and cognitive and affective percepts of a bioinformatics miniunit: a case study with recommendations for teacher education. *Journal of Science Teacher Education*, 19(4), 355-373. C; S; A, Cog, Psy; Sci, V
92. Weisman, D. (2010). Incorporating a collaborative web-based virtual laboratory in an undergraduate bioinformatics course. *Biochemistry and Molecular Biology Education*, 38(1), 4-9. C; U; A
93. White, B., Kim, S., Sherman, K., & Weber, N. (2002). Evaluation of molecular visualization software for teaching protein structure: differing outcomes from lecture and laboratory. *Biochemistry and Molecular Biology Education*, 30(2), 130-136. C; U; Cog; Rel
94. Wingreen, N. & Botstein, D. (2006). Back to the future: education for systems-level biologists. *Nature Reviews. Molecular Cell Biology*, 7(11), 829-832. C; G; Cog
95. Yang, X., & Zhang, Z. (2008). Bioinformatics education in medical college. Published in the *Proceedings of the 7th Asian-Pacific Conference on Medical and Biological Engineering*: 633-635. PD; A, Cog, Psy
